# Supplementary material for: saRNA vaccine expressing membrane-anchored RBD elicits broad and durable immunity against SARS-CoV-2 variants of concern
Source: PubMed Central journal article supplement (PMC10199074; doi:10.1038/s41467-023-38457-x), 2023-05-19
Supplement: 41467_2023_38457_MOESM1_ESM.pdf [file 41467_2023_38457_MOESM1_ESM.pdf]

## Original RBD

## Stabilized RBD

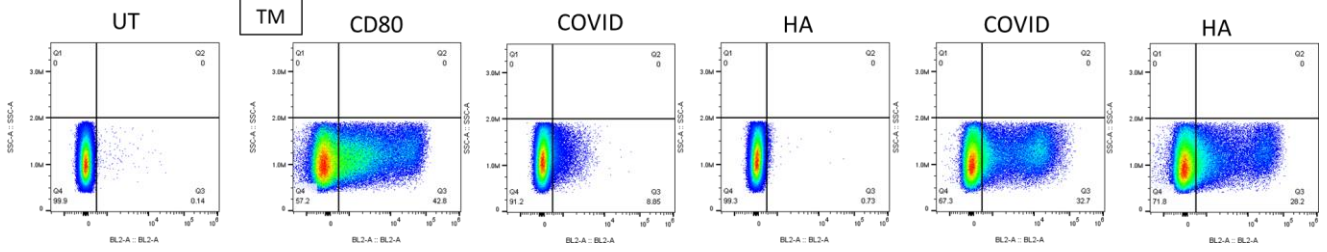

**Supplementary Figure. 1| Comparison of Original RBD (330-521aa) and Stabilized RBD (327-531aa) with transmembrane for cell surface expression of FACS**

293T cells were transfected with DNA encoding SARS-CoV-2 RBD with transmembrane. Cells were harvested 48 hours post transfection and evaluated for cell surface expression by FACS. Experiment was performed two times independently.

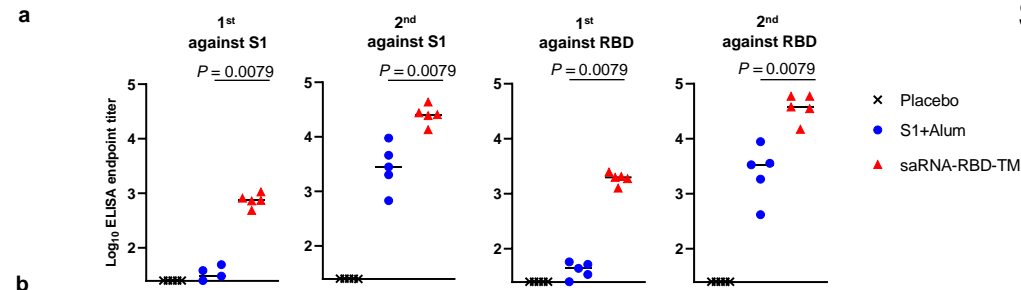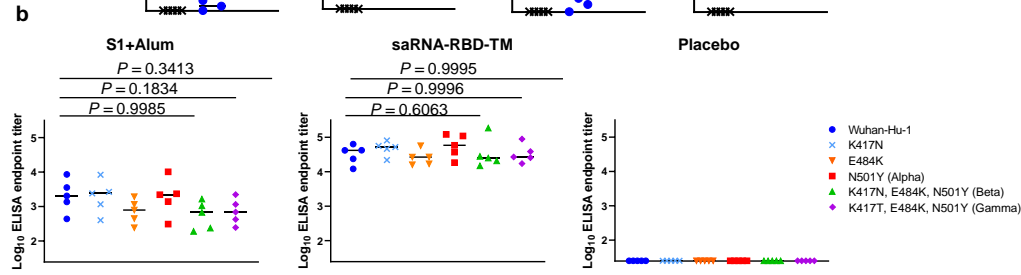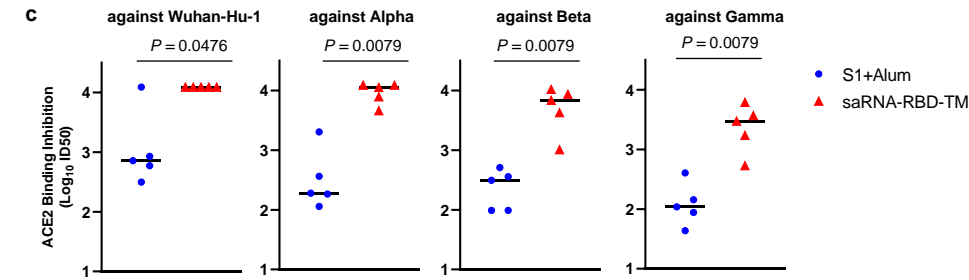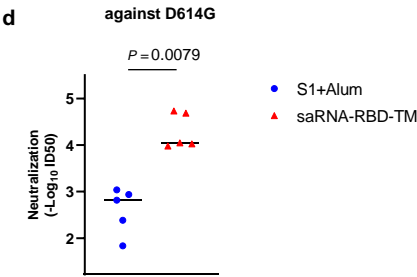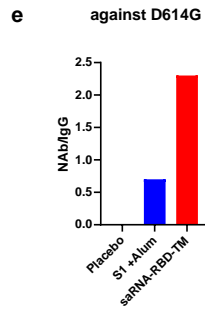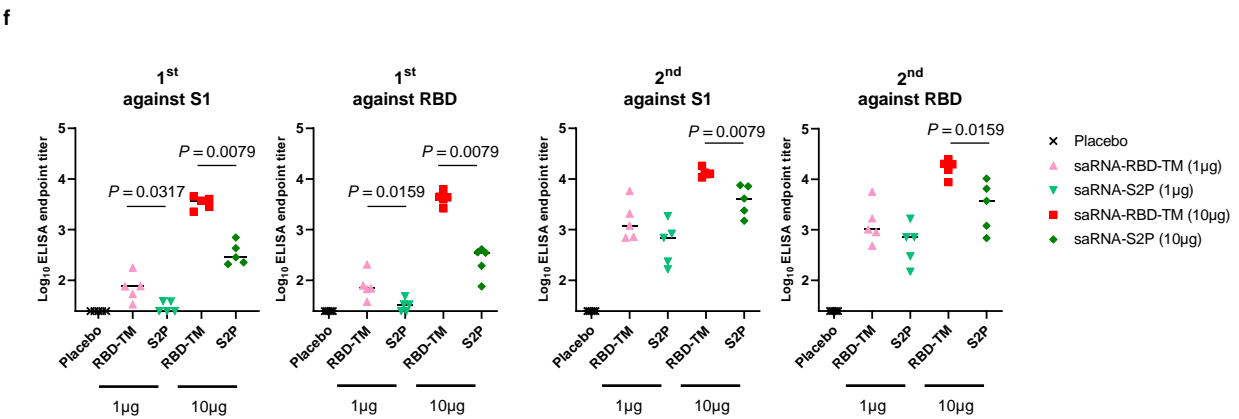

## Supplementary Figure. 2| Comparison of immunogenicity of RBD and spike based vaccines in mice

- a**, BALB/c female mice (n = 5 per group) were immunized intramuscularly twice with 10 µg of S1 protein with alum, 10 µg of saRNA-LNP expressing SARS-CoV-2 Spike RBD with TM at a 4-week interval. Antibody titers of sera from the immunized mice were evaluated by ELISA against SARS-CoV-2 Spike S1 and RBD proteins at 4 weeks after 1<sup>st</sup> immunization (Day 28) and 2 weeks after 2<sup>nd</sup> (Day 42). Plots represent individual endpoint titers with median. Mann-Whitney test (two-tailed) was used to determine significance. Experiment was performed two times independently.
- b**, Antibody titers of sera (Day 56) from the immunized mice were evaluated by ELISA against variant SARS-CoV-2 Spike RBD antigens. Plot represents individual endpoint titers with medians. One-way ANOVA was used to determine significance. Experiment was performed two times independently.
- c**, The ACE2 and RBD binding inhibition titer of sera from the immunized mice at Day 56 were measured. Plots indicate the  $\text{Log}_{10}\text{ID}_{50}$  with medians. Mann-Whitney test (two-tailed) was used to determine significance. Experiment was performed two times independently.
- d**, SARS-CoV-2 Neutralization assays against D614G (B.1.1. isolate bearing D614G) was performed for evaluating immunized mice sera at Day 42. Plots indicate the  $-\text{Log}_{10}\text{ID}_{50}$  with medians. Mann-Whitney test (two-tailed) was used to determine significance. Experiment was performed two times independently.
- e**, The ratio of neutralizing antibody against D614G and IgG in mouse were calculated using  $\text{ID}_{50}$  values from ELISA and Virus Neutralizing assay.
- f**, BALB/c female mice (n = 5 per group) were immunized intramuscularly twice with 1 µg or 10 µg of saRNA-LNP expressing SARS-CoV-2 Spike protein (S2P) or SARS-CoV-2 RBD with TM at a 3-week interval. Antibody titers of sera from the immunized mice were evaluated by ELISA against SARS-CoV-2 Spike S1 and RBD proteins at 3 weeks after 1<sup>st</sup> immunization (Day 21) and 2 weeks after 2<sup>nd</sup> (Day 35). Plots represent individual endpoint titers with median. Mann-Whitney test (two-tailed) was used to determine significance. Experiment was performed two times independently.

a

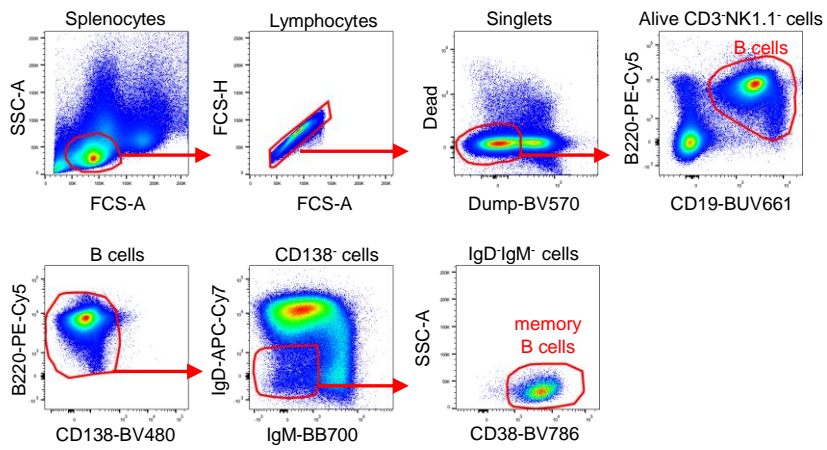

b

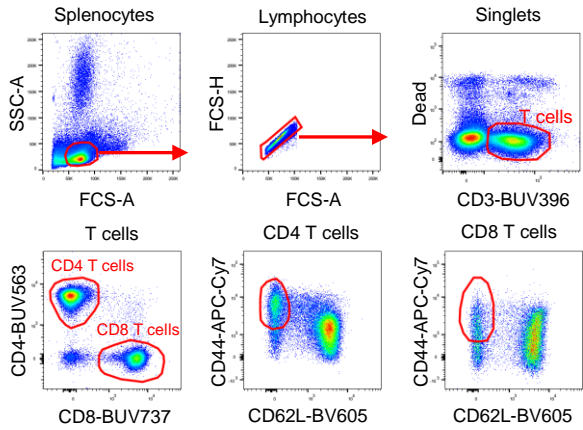

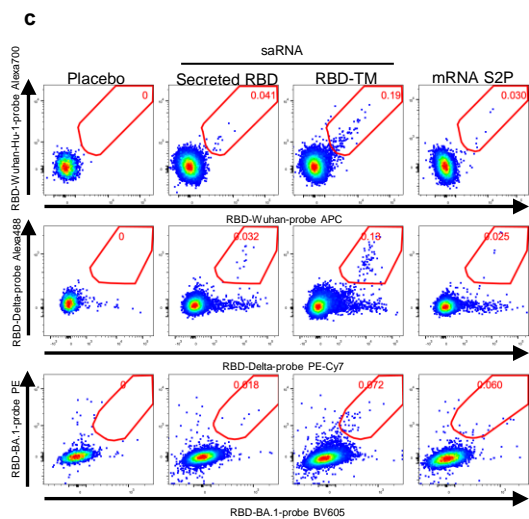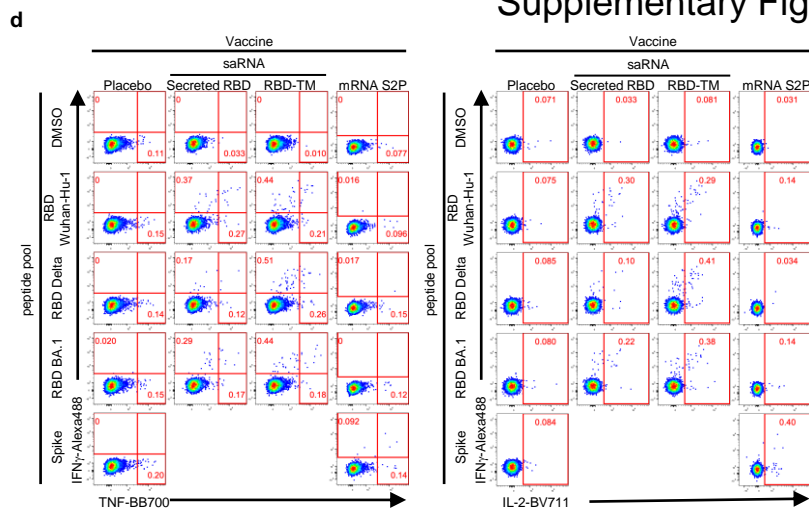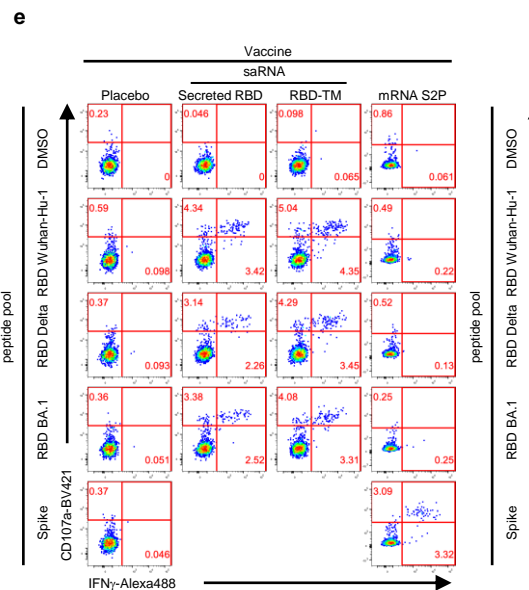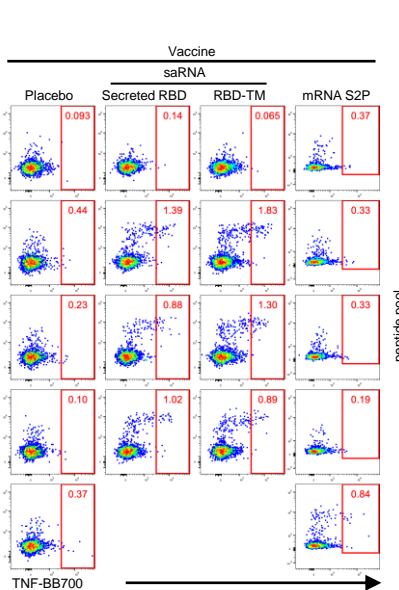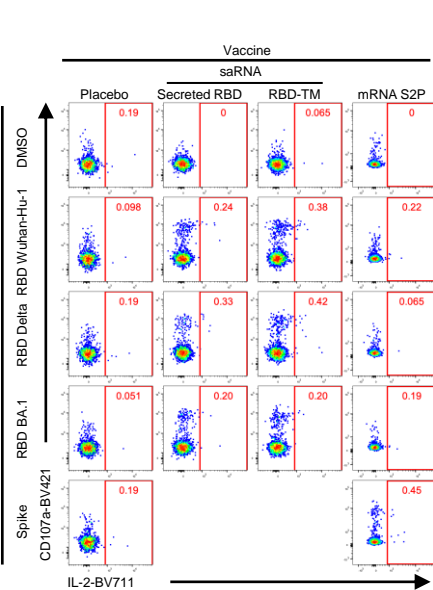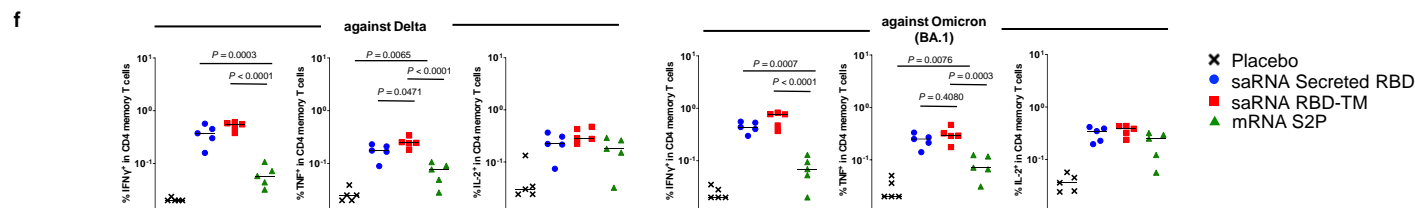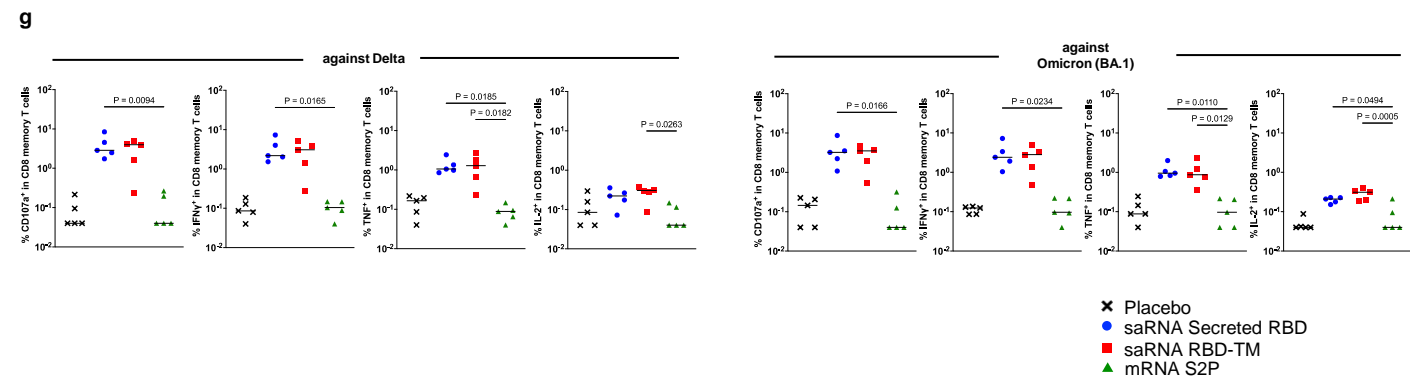

**Supplementary Figure. 3| Immunogenicity of saRNA RBD vaccine and mRNA Spike vaccine in mice related to Fig. 2**

BALB/c female mice (n = 5 per group) were immunized intramuscularly twice with a four week interval with 1 µg of saRNA-LNP expressing SARS-CoV-2 Spike variant RBD with or without TM or with 10 µg of mRNA-LNP expressing the Spike protein (S2P). All experiments were performed once.

**a,** After gating live single B cells, based on forward scatter area and height (FSC-A and -H), side scatter area (SSC-A), live/dead cell exclusion, CD3<sup>+</sup>NK1.1<sup>+</sup> cell exclusion and CD19/B220 staining, we further gated the cells into IgD<sup>+</sup>IgM<sup>+</sup>CD138<sup>+</sup>CD38<sup>+</sup> cells as memory B cells.

**b,** After gating live single T cells, based on forward scatter area and height (FSC-A and -H), side scatter area (SSC-A), live/dead cell exclusion, and CD3 staining, we separated the cells into CD4<sup>+</sup> and CD8<sup>+</sup> T cells. Subsequently, CD4<sup>+</sup> and CD8<sup>+</sup> T cells were further divided into memory phenotypes based on the expression of CD62L and CD44.

**c,** Gating strategy for quantification of RBD-specific B cells. Plots were gating on CD3<sup>+</sup>NK1.1<sup>-</sup>CD19<sup>+</sup>B220<sup>+</sup>IgD<sup>+</sup>IgM<sup>+</sup>CD138<sup>+</sup>CD38<sup>+</sup>.

**d,** Gating strategy for quantification of RBD-specific CD4 T cells. Plots were gating on CD3<sup>+</sup>CD4<sup>+</sup>CD62L<sup>+</sup>CD44<sup>+</sup>.

**e,** Gating strategy for quantification of RBD-specific CD8 T cells. Plots were gating on CD3<sup>+</sup>CD8<sup>+</sup>CD62L<sup>+</sup>CD44<sup>+</sup>.

**f,** Dot plots representing the frequencies of IFN-γ, TNF, or IL-2-secreting CD4<sup>+</sup> T cells responding to RBD Delta (upper panels) or BA.1 (lower panels) peptides in CD4<sup>+</sup> total memory cells (. The lines show the medians. One-way ANOVA was used to determine significance.

**g,** Dot plots representing the frequencies of CD107a, IFN-γ, TNF, or IL-2-secreting CD8<sup>+</sup> T cells responding to RBD Delta (upper panels) or BA.1 (lower panels) peptides in CD8<sup>+</sup> total memory cells. The lines show the medians. One-way ANOVA was used to determine significance.

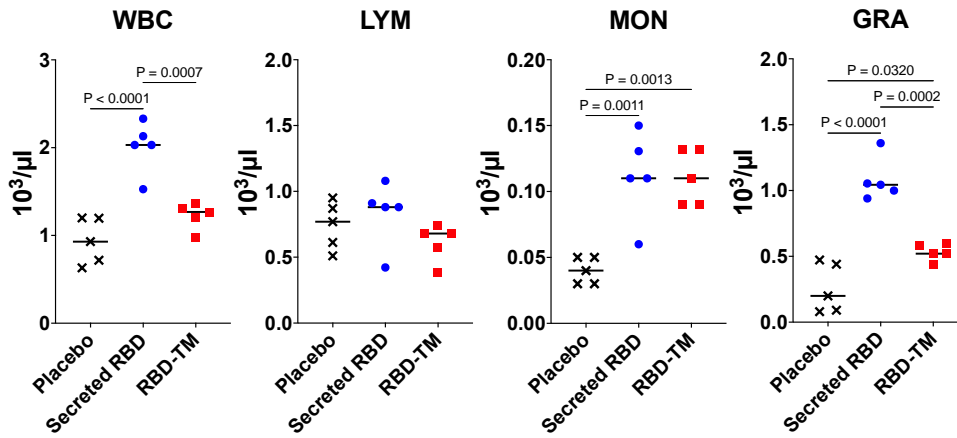

Supplementary Figure. 4| Blood cell counts in saRNA-vaccinated mice

BALB/c female mice (n = 5 per group) were immunized intramuscularly once with 1  $\mu\text{g}$  of saRNA-LNP expressing SARS-CoV-2 Spike variant RBD with (RBD-TM) or without (Secreted RBD) HA TM. Dot plots represent the absolute cell counts for white blood cells (WBC), lymphocytes (LYM), monocytes (MON) and granulocytes (GRA) 8 hours after immunization. One-way ANOVA was used to determine significance. Experiment was performed once.

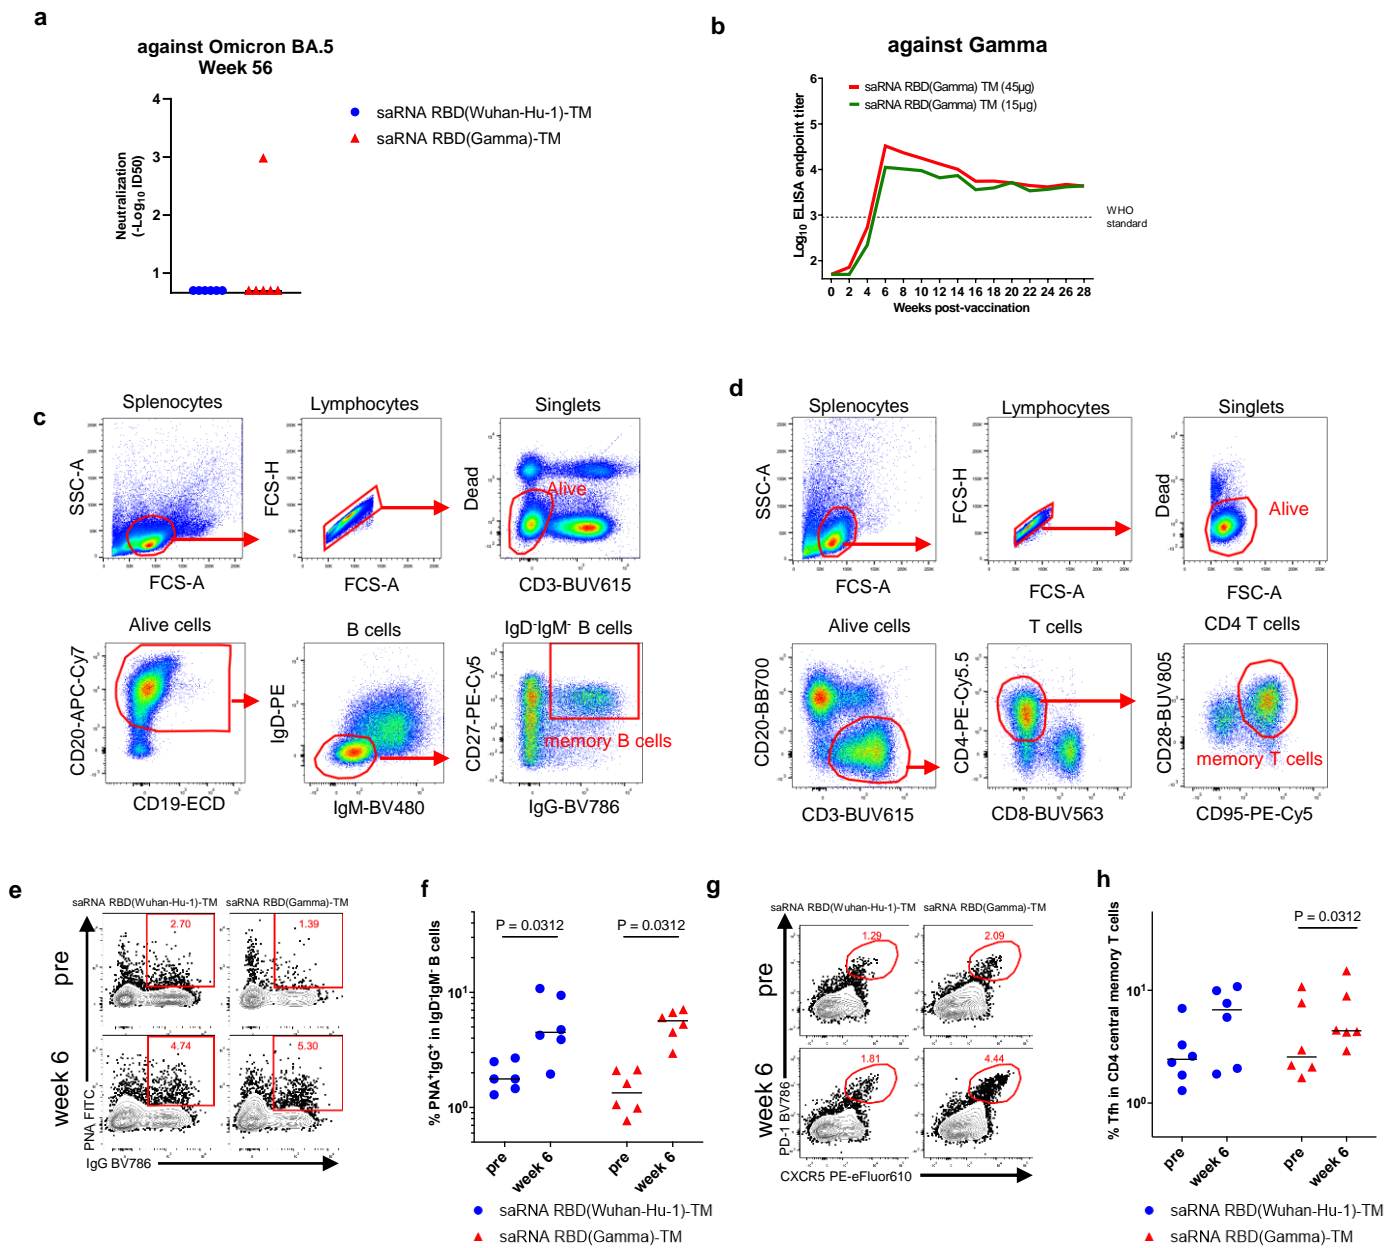



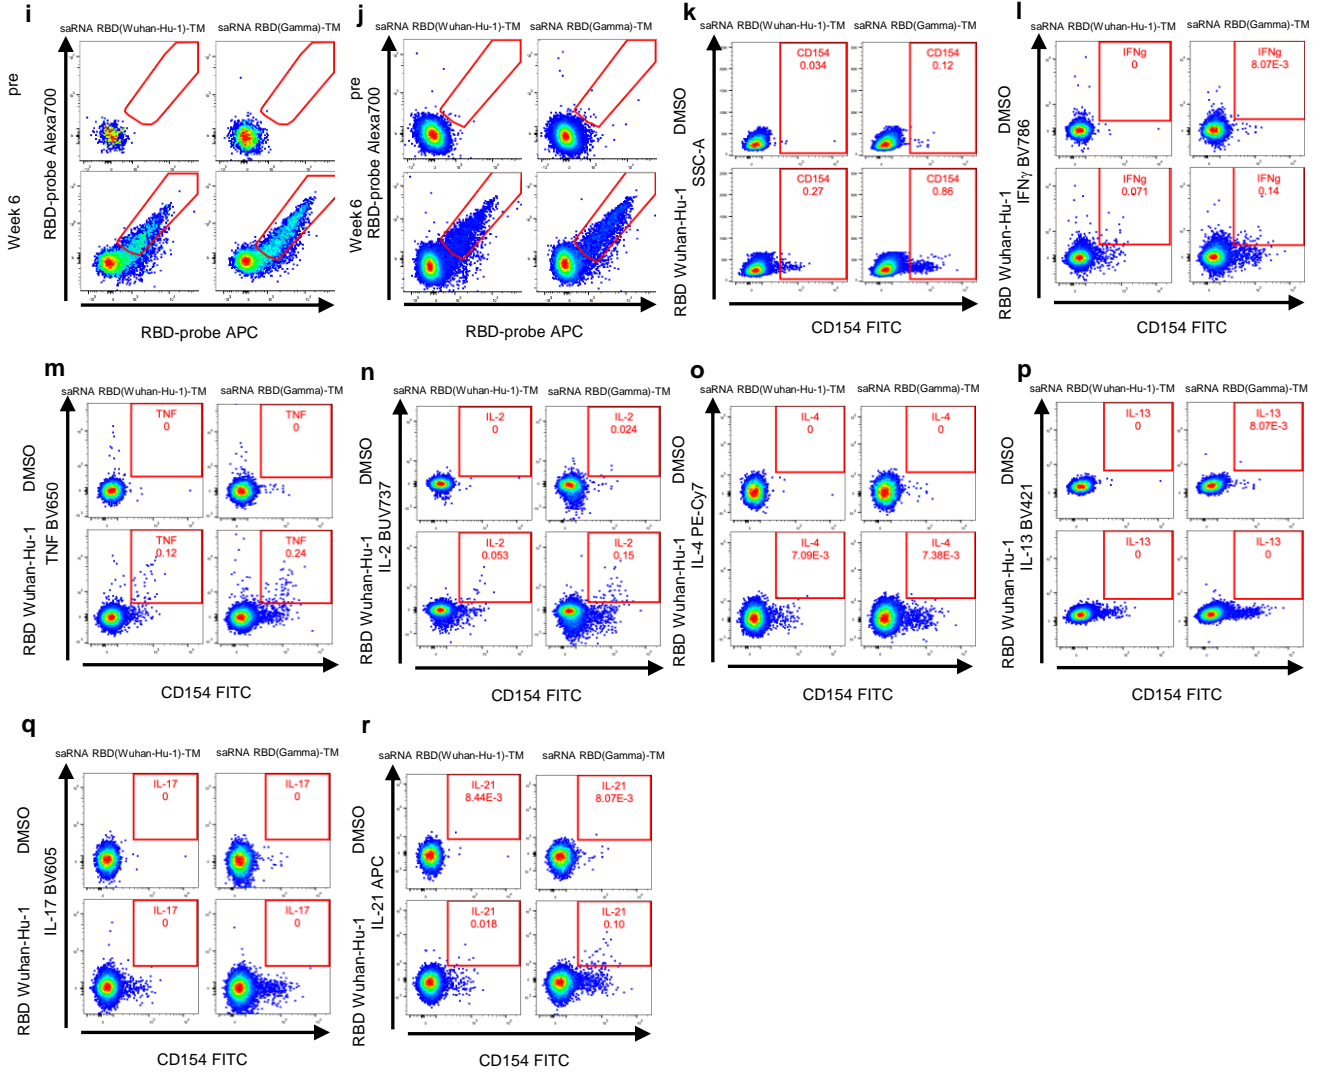

**Supplementary Figure. 5| Immunogenicity of RBD vaccine in non-human primate model related to Fig.5**

- a**, SARS-CoV-2 Neutralization assays against Omicron (BA.5) was performed for evaluating immunized sera at week 56. Plots indicate the  $-\text{Log}_{10}\text{ID}_{50}$  with medians. Experiment was performed once.
- b**, Antibody titers of plasma from the immunized macaques (n = 6 per group) were evaluated by ELISA against SARS-CoV-2 Gamma RBD. Dot-dashed lines show the endpoint titers of WHO international Standard for anti-SARS-CoV-2 immunoglobulin, human (WHO standard, NIBSC code: 20/136).
- c**, After gating live single B cells, based on forward scatter area and height (FSC-A and -H), side scatter area (SSC-A), live/dead cell exclusion, CD3<sup>+</sup> cell exclusion and CD19/CD20 staining, we further gated the cells into IgD<sup>+</sup>IgM<sup>+</sup>CD27<sup>+</sup>IgG<sup>+</sup> cells as memory B cells. Following experiments were performed once.
- d**, After gating live single T cells, based on forward scatter area and height (FSC-A and -H), side scatter area (SSC-A), live/dead cell exclusion, CD20<sup>+</sup> cell exclusion and CD3 staining, we separated the PBMCs into CD4<sup>+</sup> and CD8<sup>+</sup> T cells. Subsequently, CD4<sup>+</sup> T cells were further divided into memory phenotypes based on the expression of CD28 and CD95.
- e**, Gating strategy for quantification of germinal center (GC) B cells. GC B cells were defined as CD20<sup>+</sup>IgD<sup>+</sup>IgM<sup>+</sup>PNA<sup>+</sup>IgG<sup>+</sup>.
- f**, Dot plot represents the frequencies of GC B cells as a percentage of IgD<sup>+</sup>IgM<sup>+</sup> B cells in a lymph node (n = 6 per group). The lines show the geometric means. *P*-values (two-sided) were calculated using the Wilcoxon matched-pairs signed rank test.
- g**, Gating strategy for quantification of Tfh in a lymph node. Tfh cells were defined as CD20<sup>-</sup>CD3<sup>+</sup>CD4<sup>+</sup>CD28<sup>+</sup>CD95<sup>+</sup>CXCR5<sup>+</sup>PD-1<sup>+</sup>.
- h**, Dot plot represents the frequencies of Tfh cells as a percentage of CD4 central memory T cells in a lymph node (n = 6 per group). The lines show the geometric means. *P*-values (two-sided) were calculated using the Wilcoxon matched-pairs signed rank test.
- i, j**, Gating for quantification of RBD-specific B cells in memory B cells. Plots were gating on CD20<sup>+</sup>IgD<sup>+</sup>IgM<sup>+</sup>CD27<sup>+</sup>IgG<sup>+</sup>.
- k-r**, Gating for quantification of RBD-specific CD4<sup>+</sup> T cells. Plots were gating on CD20<sup>-</sup>CD3<sup>+</sup>CD4<sup>+</sup>CD28<sup>+</sup>CD95<sup>+</sup>.

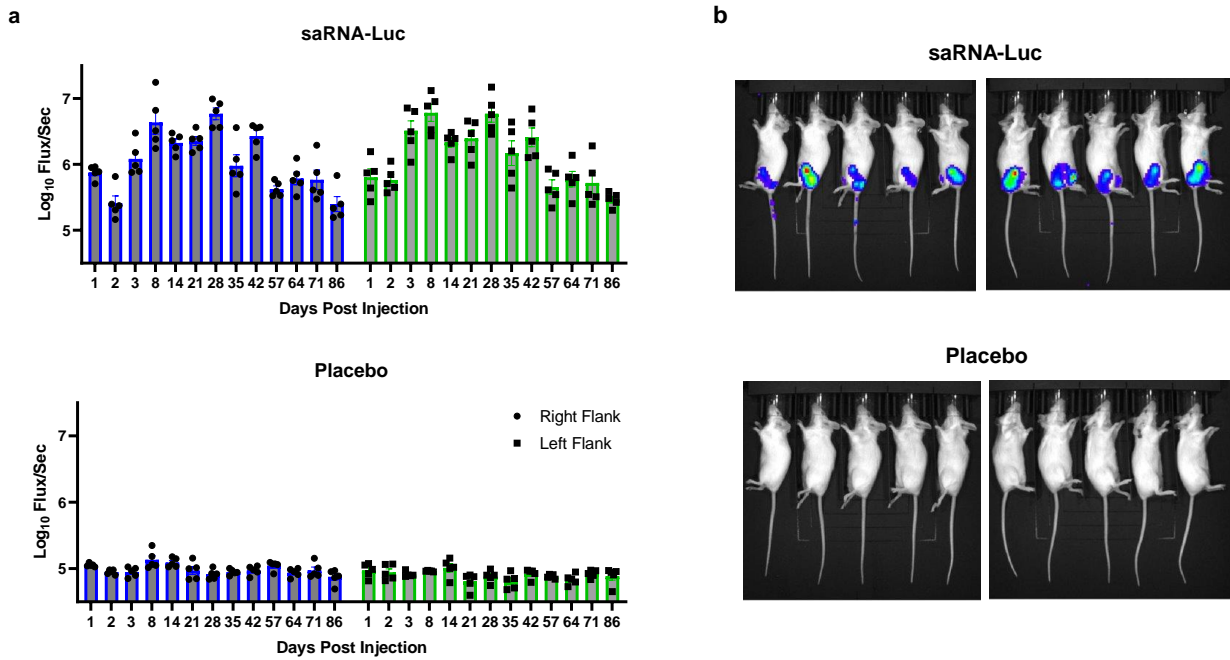

### Supplementary Figure. 6 | Imaging of saRNA expressing Luciferase in mice

BALB/c female mice (n=5 per group) were injected intramuscularly once with 10  $\mu$ g of saRNA-Luciferase-LNP or saRNA-RBD-TM-LNP (Placebo) on the right and left flank at Day 0. IVIS imaging was performed at Day 1, 2, 3, 8 and following every seven days until Day 86.

**a**, Plots represent individual  $\text{Log}_{10}$  Flux/Sec with mean  $\pm$  SEM.

**b**, Image at 28 days post injection.
